RETRACTION

## Retraction: Role of globalziation defining the incidence of entrepreneurship

The *PLOS One* Editors

The *PLOS One* Editors retract this article [1] due to concerns about:

- Non-compliance with PLOS policy on Authorship.
- Non-adherence to the journal's first, second, third and fourth publication criteria.
- Insufficient detail of the specific datasets and sources of data used in this study to be reproducible.

NA and KH did not agree with the retraction. SA, SS, YAK, and SK either did not respond directly or could not be reached.

### Reference

1. Ahmad S, Arshed N, Salem S, Khan YA, Hameed K, Kam S. RETRACTED: Role of globalziation defining the incidence of entrepreneurship. *PLoS One*. 2022;17(3):e0265757. <https://doi.org/10.1371/journal.pone.0265757> PMID: [35349596](https://pubmed.ncbi.nlm.nih.gov/35349596/)

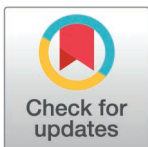

### OPEN ACCESS

Citation: The *PLOS One* Editors (2026) Retraction: Role of globalziation defining the incidence of entrepreneurship. *PLoS One* 21(4): e0346952. <https://doi.org/10.1371/journal.pone.0346952>

**Published:** April 14, 2026

**Copyright:** © 2026 The *PLOS One* Editors. This is an open access article distributed under the terms of the [Creative Commons Attribution License](https://creativecommons.org/licenses/by/4.0/), which permits unrestricted use, distribution, and reproduction in any medium, provided the original author and source are credited.
